# Supplementary material for: Halolysin SptA, a Serine Protease, Contributes to Growth-Phase Transition of Haloarchaeon Natrinema sp. J7-2, and Its Expression Involves Cooperative Action of Multiple Cis-Regulatory Elements
Source: PubMed Central journal article supplement (PMC6085418; doi:10.3389/fmicb.2018.01799), 2018-08-03
Supplement: Presentation_1.pdf [file Presentation_1.pdf]

## SUPPLEMENTAL MATERIAL

### **Halolysin SptA, a serine protease, contributes to growth-phase transition of haloarchaeon *Natrinema* sp. J7-2, and its expression involves cooperative action of multiple *cis*-regulatory elements**

Moran Li,<sup>a</sup> Jing Yin,<sup>a</sup> Sha Mei,<sup>a</sup> Xuhong Wang,<sup>a</sup> Xiao-Feng Tang,<sup>a,b#</sup> Bing Tang,<sup>a,b#</sup>

State Key Laboratory of Virology, College of Life Sciences, Wuhan University, Wuhan, China<sup>a</sup>; Hubei Provincial Cooperative Innovation Center of Industrial Fermentation, Wuhan, China<sup>b</sup>

Running title: Function and regulation of halolysin SptA

#Address correspondence to Xiao-Feng Tang, tangxf@whu.edu.cn; Bing Tang, tangb@whu.edu.cn.

**TABLE S1. Strains and plasmids used in this study**

| Strain or plasmid     | Description                                                                                                                                                                                | Reference or source |
|-----------------------|--------------------------------------------------------------------------------------------------------------------------------------------------------------------------------------------|---------------------|
| <b>Strains</b>        |                                                                                                                                                                                            |                     |
| <i>E. coli</i>        |                                                                                                                                                                                            |                     |
| DH5 $\alpha$          | F <sup>-</sup> $\phi$ 80d/lacZ $\Delta$ M15 $\Delta$ (lacZYA-argF) U169 <i>deoR recA1 hsdR17</i> (rk <sup>-</sup> mk <sup>-</sup> ) <i>phoA supE44</i> $\lambda$ <i>thi-1 gyrA96 relA1</i> | Novagen             |
| JM110                 | <i>dam dcm supE44 hsdR17 thi leu rpsL1 lacY galK galT ara tonA thr tsx</i> (lac-proAB)/F' [ <i>traD36 proAB</i> <sup>+</sup> lac <sup>F</sup> lacZ $\Delta$ M15]                           | Novagen             |
| <i>Natrinema</i> sp.  |                                                                                                                                                                                            |                     |
| J7-2                  | A subculture of <i>Natrinema</i> sp. J7 (CCTCC AB91141) lacking the plasmid pHH205                                                                                                         | (1)                 |
| $\Delta$ <i>sptA1</i> | J7-2 mutant with a deletion of the core promoter and ORF region (-43 to +1655) of <i>sptA</i>                                                                                              | This study          |
| $\Delta$ <i>sptA2</i> | J7-2 mutant with a deletion of the core promoter and transcript region (-43 to +1925) of <i>sptA</i>                                                                                       | This study          |
| <b>Plasmids</b>       |                                                                                                                                                                                            |                     |
| pNBK07                | Haloarchaeal nonreplicative plasmid, Mev <sup>R</sup> , Amp <sup>R</sup>                                                                                                                   | (2)                 |
| pNBK- <i>Aud</i>      | Knockout plasmid for the core promoter and ORF region of <i>sptA</i>                                                                                                                       | This study          |
| pNBK-3'UTR <i>ud</i>  | Knockout plasmid for the 3'UTR region of <i>sptA</i>                                                                                                                                       | This study          |
| pYC-SHSmcs            | <i>E. coli</i> - <i>Natrinema</i> sp. J7-2 shuttle vector, Mev <sup>R</sup> , Amp <sup>R</sup>                                                                                             | (2)                 |
| pSHS- <i>sptA</i>     | pYC-SHSmcs-derived vector containing the core promoter and ORF region of <i>sptA</i> (-43 to +1655)                                                                                        | This study          |
| pD355                 | pYC-SHSmcs-derived vector containing <i>sptA</i> transcript and its 5'-flanking region (-335 to +1925)                                                                                     | This study          |
| pD215                 | pYC-SHSmcs-derived vector containing <i>sptA</i> transcript and its 5'-flanking region (-215 to +1925)                                                                                     | This study          |
| pD174                 | pYC-SHSmcs-derived vector containing <i>sptA</i> transcript and its 5'-flanking region (-174 to +1925)                                                                                     | This study          |

|                 |                                                                                                         |            |
|-----------------|---------------------------------------------------------------------------------------------------------|------------|
| pD142           | pYC-SHSmcs-derived vector containing <i>sptA</i> transcript and its 5'-flanking region (-142 to +1925)  | This study |
| pD116           | pYC-SHSmcs-derived vector containing <i>sptA</i> transcript and its 5'-flanking region (-116 to +1925)  | This study |
| pD82            | pYC-SHSmcs-derived vector containing <i>sptA</i> transcript and its 5'-flanking region (-82 to +1925)   | This study |
| pD63            | pYC-SHSmcs-derived vector containing <i>sptA</i> transcript and its 5'-flanking region (-63 to +1925)   | This study |
| pD51            | pYC-SHSmcs-derived vector containing <i>sptA</i> transcript and its 5'-flanking region (-51 to +1925)   | This study |
| pD43            | pYC-SHSmcs-derived vector containing <i>sptA</i> transcript and its 5'-flanking region (-43 to +1925)   | This study |
| pM1 to pM3-6-11 | pD215-derived vectors with mutations introduced into 5'-flanking region of <i>sptA</i>                  | This study |
| pST1            | A vector containing haloarchaeal <i>bgaH</i> gene, Amp <sup>R</sup> , Nov <sup>R</sup>                  | (3)        |
| pD215b          | pYC-SHSmcs-derived vector containing <i>bgaH</i> ORF and 5'-flanking region (-215 to -1) of <i>sptA</i> | This study |
| pD142b          | pYC-SHSmcs-derived vector containing <i>bgaH</i> ORF and 5'-flanking region (-142 to -1) of <i>sptA</i> | This study |
| pD116b          | pYC-SHSmcs-derived vector containing <i>bgaH</i> ORF and 5'-flanking region (-116 to -1) of <i>sptA</i> | This study |
| pD63b           | pYC-SHSmcs-derived vector containing <i>bgaH</i> ORF and 5'-flanking region (-63 to -1) of <i>sptA</i>  | This study |
| pD43b           | pYC-SHSmcs-derived vector containing <i>bgaH</i> ORF and 5'-flanking region (-43 to -1) of <i>sptA</i>  | This study |

## References

1. Feng J, Liu B, Zhang Z, Ren Y, Li Y, Gan F, Huang Y, Chen X, Shen P, Wang L, Tang B, Tang XF. 2012. The complete genome sequence of *Natrinema* sp. J7-2, a haloarchaeon capable of growth on synthetic media without amino acid supplements. PLoS One 7:e41621.
2. Wang Y, Sima L, Lv J, Huang S, Liu Y, Wang J, Krupovic M, Chen X. 2016. Identification, characterization, and application of the replicon region of the halophilic temperate sphaerolipovirus SNJ1. J Bacteriol 198:1952-1964.
3. Tang W, Wu Y, Li M, Wang J, Mei S, Tang B, Tang XF. 2016. Alternative translation initiation of a haloarchaeal serine protease transcript containing two in-frame start codons. J Bacteriol 198:1892-1901.

**TABLE S2. Primers used in this study**

| <b>Primer</b>                                          | <b>Sequence (5'→3')<sup>a</sup></b>           |
|--------------------------------------------------------|-----------------------------------------------|
| <b>Gene knockout</b>                                   |                                               |
| SptA-F                                                 | ATGTTTAGGAAGAATTTAATAG                        |
| SptA-R                                                 | CTATCGACCGCGTTCGTCG                           |
| SptAus-F                                               | GAAGATCTTCTCAACGAACAACCCGACTG                 |
| SptAus-R                                               | GCGGCCGCGCTCGATCAAGAAATACAATAGAT              |
| SptAds-F                                               | ATCTATTGTATTTCTTGATCGAGCGGCGGCCG              |
| SptAds-R                                               | CCCAAGCTTGGGGGAACGACAGTCAGCAAGT               |
| 3'UTRus-R                                              | GTGAACTCAGCGGTTTACAAGAAATACAATAGAT            |
| 3'UTRds-F                                              | ATCTATTGTATTTCTTGTAACCGCTGAGTTCAC             |
| 3'UTRds-R                                              | CCCAAGCTTGGGGGCACGGGCCTCACTGGCCAC             |
| 3'UTR-F                                                | CGAACGCGGTTCGATAGATGAGCAGCGGAGGCC             |
| 3'UTR-R                                                | GGCTCCGCTGCTCATCTATCGACCGCGTTCG               |
| <b>Gene complementary expression</b>                   |                                               |
| SptA-BamHI-F                                           | CGGGATCCCGATGTTTAGGAAGAATTTAATAGCGTG<br>CTGG  |
| SptA-HindIII-R                                         | CCCAAGCTTGGGCTATCGACCGCGTTCGTCGATAGT<br>CATGG |
| <b>Truncation of 5'-flanking region of <i>sptA</i></b> |                                               |
| up335-F                                                | CGGGATCCCGACGCGGTCAAACATGGTC                  |
| up215-F                                                | CGGGATCCCGGATGGTCCGAATCACCCC                  |
| up174-F                                                | CGGGATCCCGAATAAACATTCCCTAAGTTCATTTC           |
| up142-F                                                | CGGGATCCCGTACAATTATTACTATTAC                  |
| up116-F                                                | CGGGATCCCGACCCTCATCATGGGTACTION               |
| up82-F                                                 | CGGGATCCCGGATTATAATATTAGTGTTTCG               |
| up63-F                                                 | CGGGATCCCGGAAATCTATTGTATTTCTTG                |
| up51-F                                                 | CGGGATCCCGATTCTTGATGTTTAGGAAG                 |
| up43-F                                                 | CGGGATCCCGATGTTTAGGAAGAATTTAATAGCGTG<br>CTGG  |
| 3'UTR-HindIII-R                                        | CCCAAGCTTGGGATATAAGGTGTGGATATG                |
| <b>Replacement of <i>sptA</i> with <i>bgaH</i></b>     |                                               |
| up-bgaH-R                                              | TAGCAGACACCAACTGTCATAACGCAACCGAAGAA<br>ATTCC  |
| bgaH-HindIII-R                                         | CCCAAGCTTGGGTCACCTCGGACGCGAGTCC               |

### **Mutation of 5'-flanking region of *sptA***

|       |                                                      |
|-------|------------------------------------------------------|
| m1-R  | AAATACAATAG <b>CGGG</b> GAGAACTAATA                  |
| m2-R  | CCTAAACATCAAGAAC <b>CGACA</b> ATAGATTT <b>CGAACA</b> |
| m3-R  | ATTCTTCCTAAACAT <b>CCCGAA</b> ATACAATAG              |
| m4-R  | ACGCTATTAA <b>AGGAGG</b> CCCTAAACATCA                |
| m5-R  | TCCAGCACGCT <b>CGCC</b> CTTCTTCCTAAA                 |
| m6-R  | AACCGAAGAA <b>AGGACAG</b> CACGCTAT                   |
| m7-R  | ATAACGCAACCT <b>CCGAA</b> ATTCCAGC                   |
| m8-R  | CTTAGGGAAT <b>GGGGCGG</b> CCACA <b>ACTCTT</b>        |
| m9-R  | AATGAACTTAG <b>TTCCG</b> TTTTATTCCACA                |
| m10-R | GACTGAAATGAC <b>AGGCTG</b> GAAATGTTTAT               |
| m11-R | GTATGCGACTG <b>CCCGTCA</b> CTTAGGGAAAT               |
| m12-R | ATAATTGTATGAT <b>CATGAA</b> ATGAACTTA                |
| m13-R | GTAATAGTAATAAT <b>GTGCGT</b> CGACTGAAATG             |
| m14-R | GTGTAATAGTAC <b>CGCGT</b> GTATGCGACT                 |
| m15-R | ACCAAGTGTAATAT <b>GCATA</b> ATTGTATGCGA              |
| m16-R | GTTACCAAGT <b>GGCCGCG</b> TAATAATTGT                 |

### **qRT-PCR**

|              |                      |
|--------------|----------------------|
| SptAQRT-F    | CGAACATTGTCCACACGAAC |
| SptAQRT-R    | GGTCACGTTGTCTTCGGAGT |
| 16SrRNAQRT-F | GGTACGGGTTGTGAGAGCAA |
| 16SrRNAQRT-R | CAGTGTAAGGTTTCGCGCC  |

<sup>a</sup> Italicized sections indicate restriction enzyme sites. The mutated nucleotides are in bold.

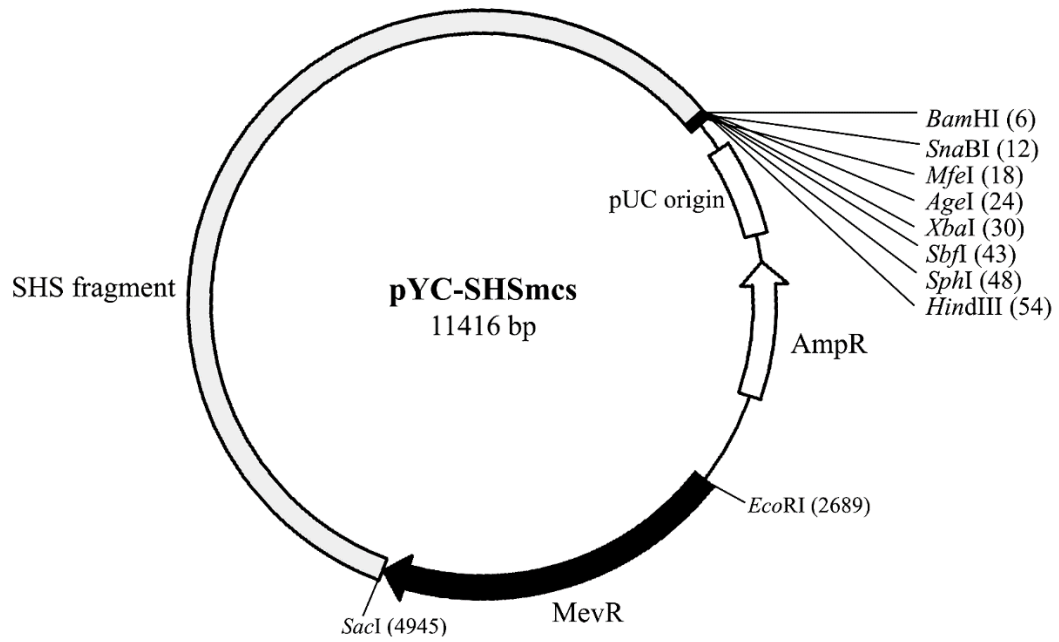

**FIG S1** A restriction map of the plasmid pYC-SHSmcs. SHS fragment represents the minimal replicon of SNJ1, which is a temperate haloarchaeal virus identified in *Natrinema* sp. J7.

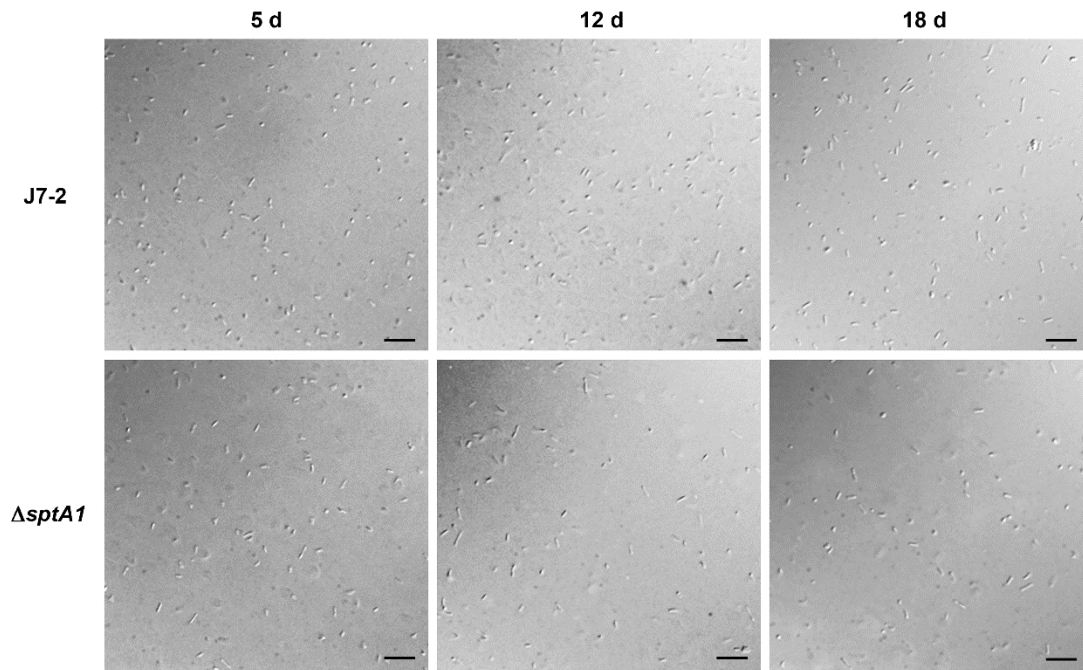

**FIG S2** Phase-contrast microscopy of strain J7-2 and mutant  $\Delta sptA1$  grown in 23% MGM. The late-log (5 d) and death (12 d and 18 d) phase cultures were examined. Bars = 10  $\mu\text{m}$ .

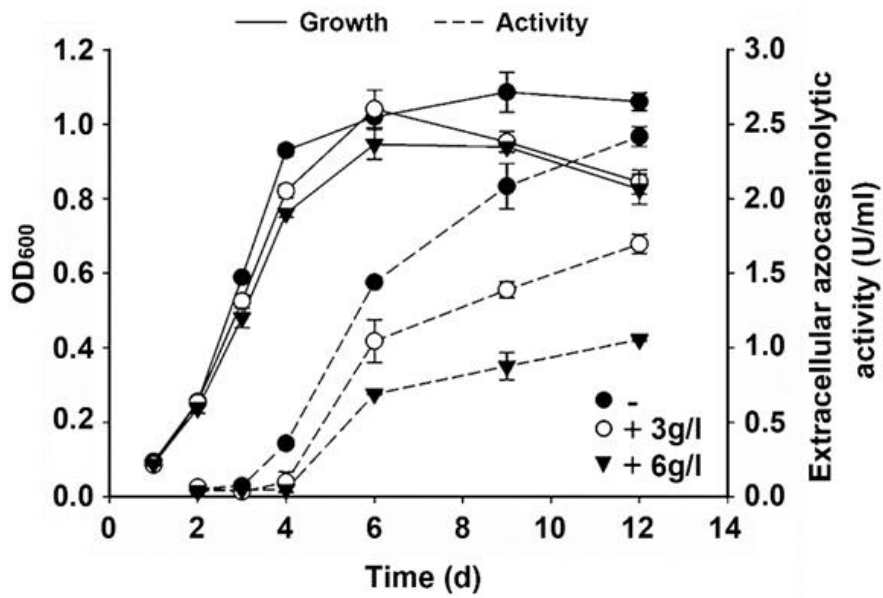

**FIG S3** Effects of ammonium on SptA production in *Natrinema* sp. J7-2. Strain J7-2 was cultivated at 37°C in 23% MGM without (-) or with (+) 3 or 6 g/l of NH<sub>4</sub>Cl. Haloarchaeal growth was monitored by change in OD<sub>600</sub>, and the culture supernatants were subjected to azocaseinolytic activity assay. Values are expressed as the means and standard deviations (error bars) of three independent experiments.
